# Supplementary material
Source: MDPI journal article supplement (https://www.mdpi.com/2304-6740/7/1/1)
Supplement: s1 [file s1]

# Supplementary Materials: Investigation of 1-Methylcytosine as a Ligand in Gold(III) Complexes: Synthesis and Protein Interactions

James Beaton and Nicholas P. Farrell \*

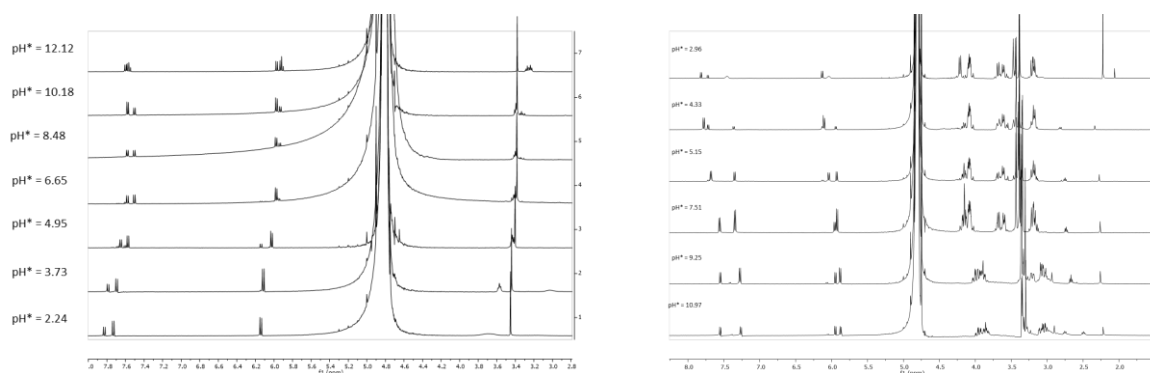

**Figure S1.** The  $^1\text{H}$ -NMR spectra of **A** (left) and **B** (right) at varying pH\* values, where pH\* is the reading of the pH meter.

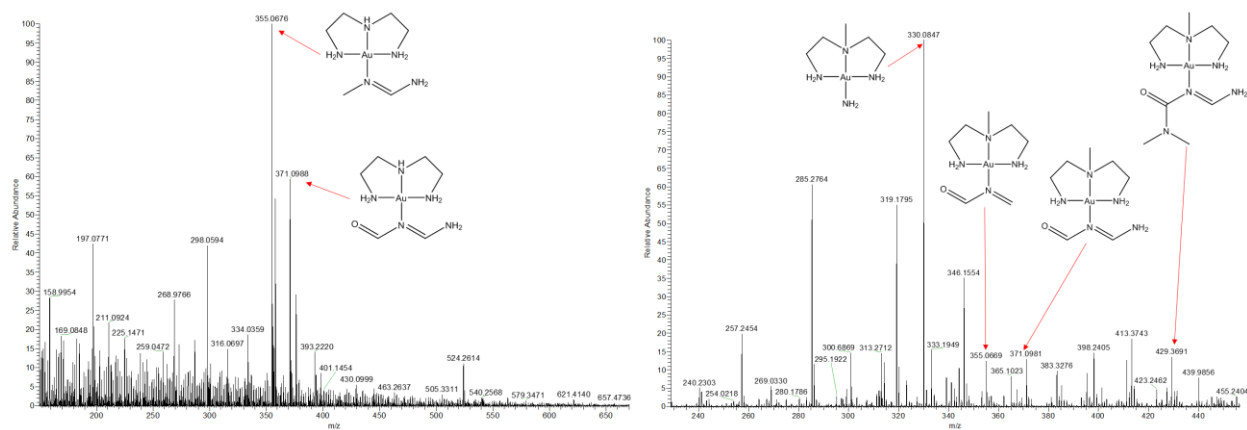

**Figure S2.** Mass spectra of **A** (left) and **B** (right)

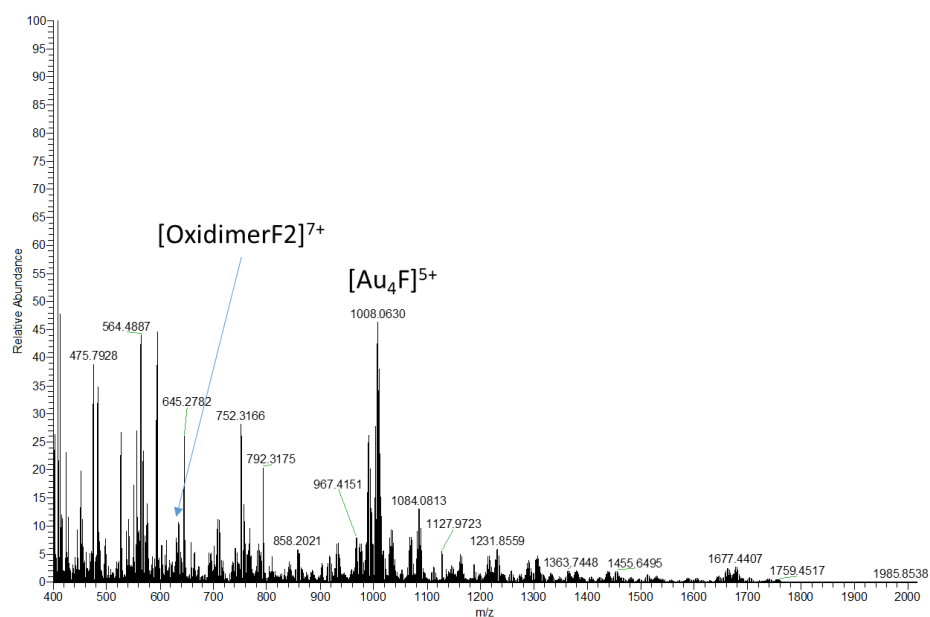

Figure S3. Mass spectrum of A with NCp7-F2 immediately after mixing.

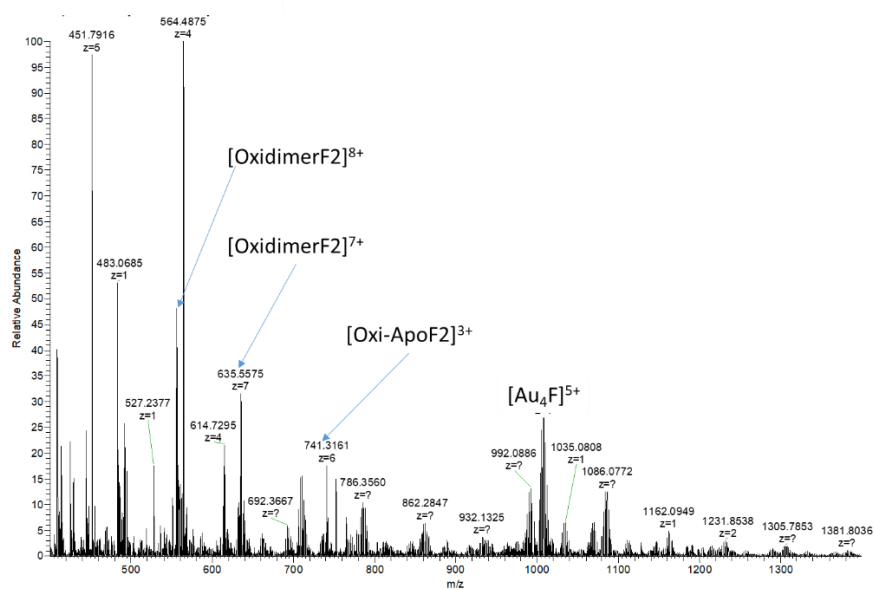

Figure S4. Mass spectrum of A with NCp7-F2 6 hours after mixing.

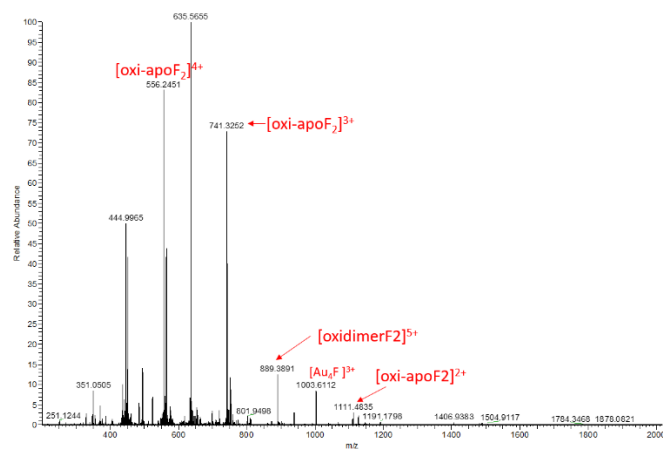

**Figure S5.** Mass spectrum of **B** with NCp7-F2 1 hour after mixing

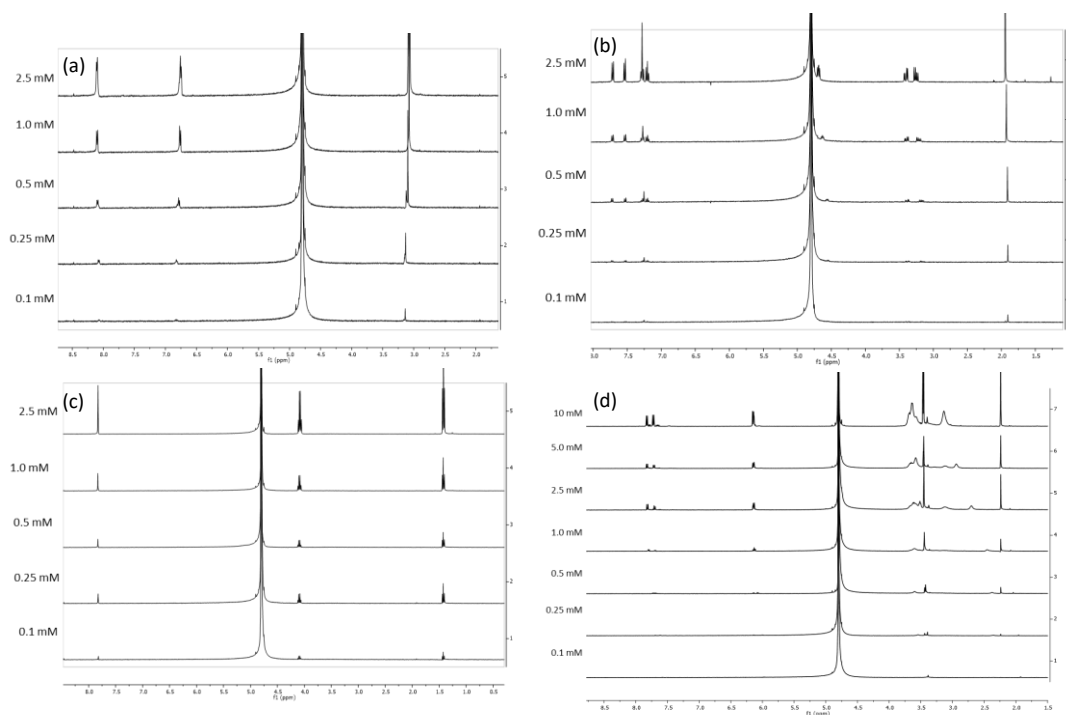

**Figure S6.** Self-association determination of (a) DMAP, (b) NAcTrp, (c) 9-EtGua, and (d) **A**. In each case, self-association was negligible on the scale of association between the complexes and NAcTrp.
